# Supplementary material for: High performance Ce-doped ZnO nanorods for sunlight-driven photocatalysis
Source: PubMed Central journal article supplement (PMC5082445; doi:10.3762/bjnano.7.125), 2016-09-26
Supplement: Beilstein_J_Nanotechnol-07-1338-s001.pdf [file Beilstein_J_Nanotechnol-07-1338-s001.pdf]

# **Supporting Information**

## **for**

# **High performance Ce-doped ZnO nanorods for sunlight-driven photocatalysis**

Bilel Chouchene<sup>1</sup>, Tahar Ben Chaabane<sup>1</sup>, Lavinia Balan<sup>2</sup>, Emilien Girot<sup>3</sup>, Kevin Mozet<sup>3</sup>, Ghouti Medjahdi<sup>4</sup> and Raphaël Schneider\*<sup>3</sup>

Address: <sup>1</sup>Unité de Recherche Synthèse et Structure de Nanomatériaux UR 11 ES 30, Université de Carthage, Faculté des Sciences de Bizerte, 7021 Jarzouna, Bizerte, Tunisia, <sup>2</sup>Institut de Science des Matériaux de Mulhouse (IS2M), CNRS, UMR 7361, 15 rue Jean Starcky, 68093 Mulhouse, France, <sup>3</sup>Université de Lorraine, Laboratoire Réactions et Génie des Procédés (LRGP), UMR 7274, CNRS, 1 rue Grandville, BP 20451, 54001 Nancy Cedex, France and <sup>4</sup>Institut Jean Lamour (IJL), Université de Lorraine, CNRS, UMR 7198, CNRS, BP 70239, 54506 Vandoeuvre-lès-Nancy Cedex, France

Email: Raphaël Schneider - [raphael.schneider@univ-lorraine.fr](mailto:raphael.schneider@univ-lorraine.fr)

\* Corresponding author

## Additional experimental data

**Table S1:** Lattice parameters of ZnO and ZnO:Ce rods.

| Doping in Ce (%) | a (Å) | c (Å) | Lattice volume (Å <sup>3</sup> ) |
|------------------|-------|-------|----------------------------------|
| 0                | 3.244 | 5.197 | 47.35                            |
| 1                | 3.246 | 5.201 | 47.44                            |
| 3                | 3.253 | 5.212 | 47.78                            |
| 5                | 3.254 | 5.213 | 47.80                            |
| 7                | 3.250 | 5.206 | 47.61                            |
| 10               | 3.249 | 5.206 | 47.61                            |

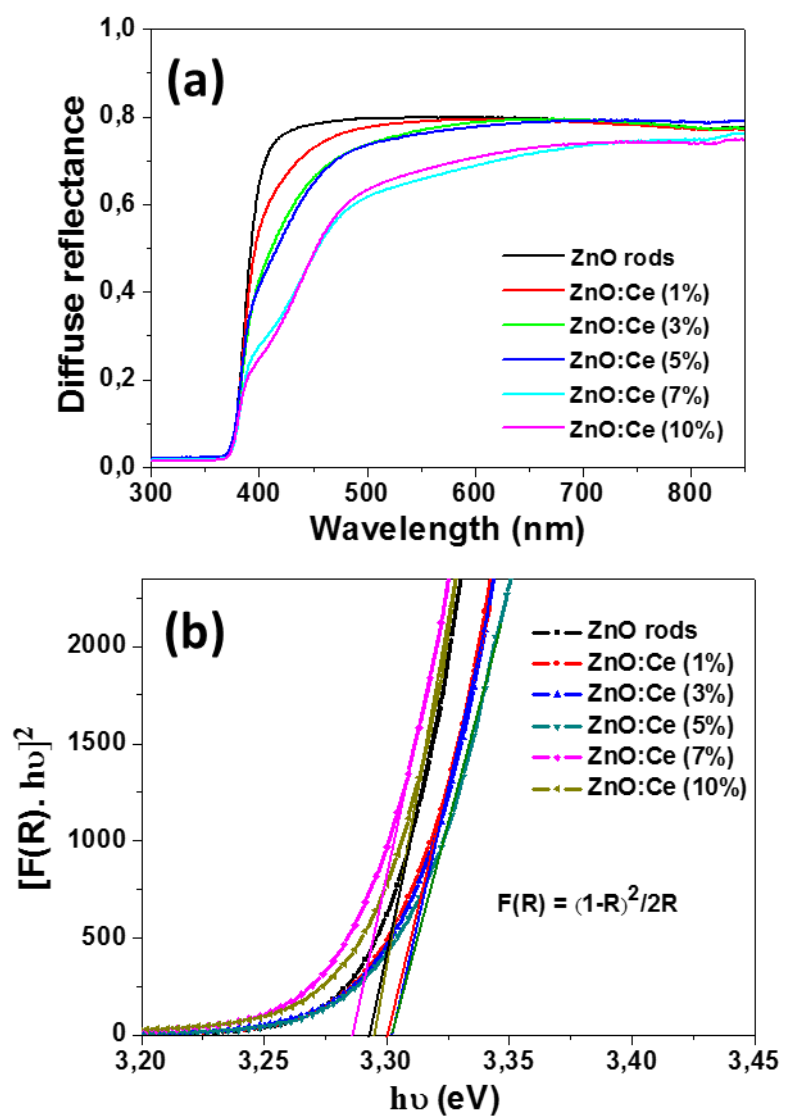

**Figure S1:** (a) UV–visible absorption spectra of ZnO and ZnO:Ce rods, (b) Tauc plots of ZnO and ZnO:Ce rods for the determination of bandgap energy values.

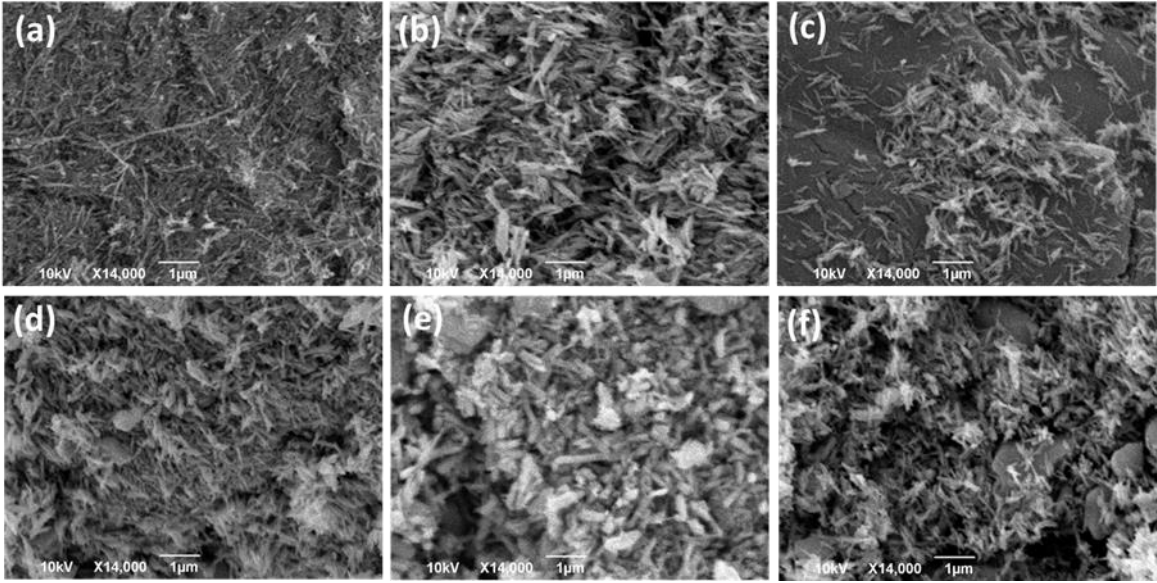

**Figure S2:** SEM images of (a) ZnO rods and (b–f) ZnO rods doped with 1, 3, 5, 7 and 10% Ce, respectively.

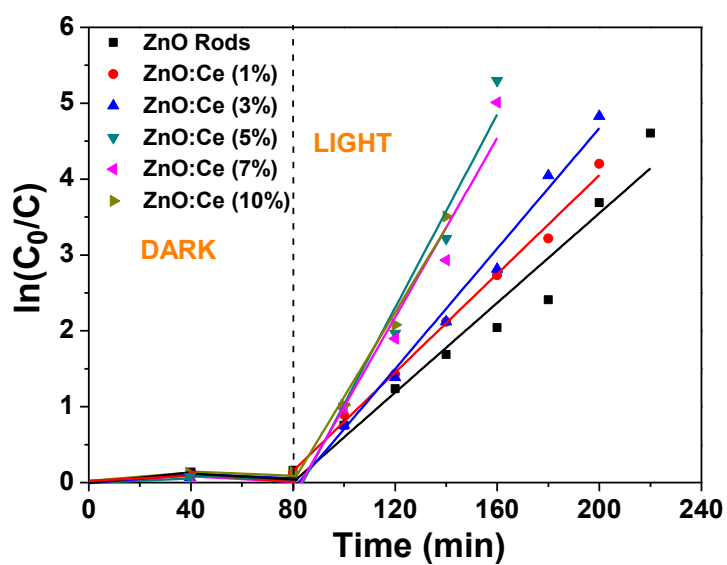

**Figure S3:** Plots of  $\ln(C_0/C)$  of Orange II versus reaction time when varying the dopant percentage in Ce in the photocatalyst (concentration of Orange II = 10 mg/L).

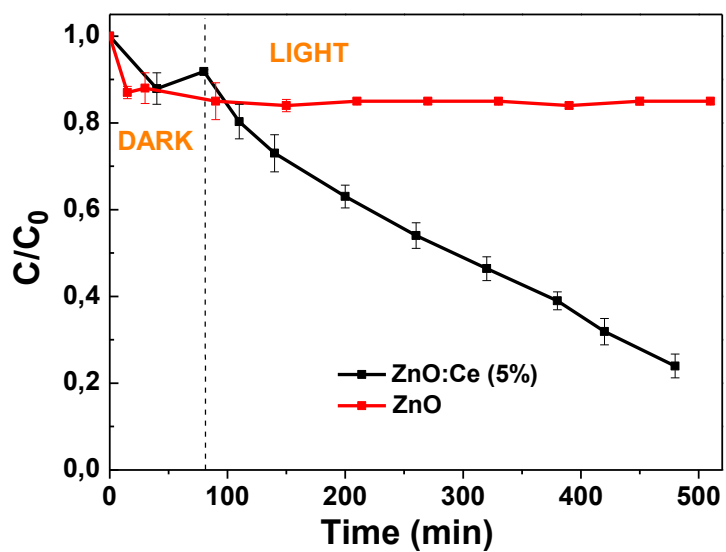

**Figure S4:** Comparison of the photocatalytic efficiencies under visible light irradiation of ZnO and 5% Ce-doped ZnO rods.

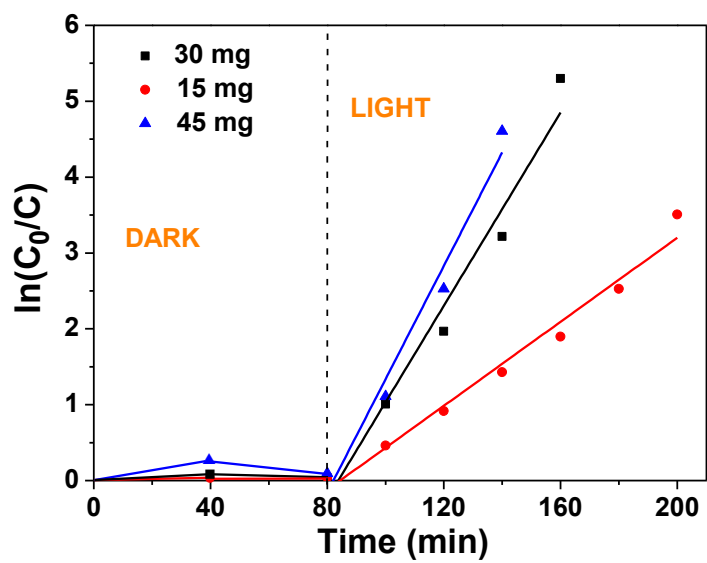

**Figure S5:** Plots of  $\ln(C_0/C)$  of Orange II versus reaction time when varying the amount of ZnO:Ce catalyst (concentration of Orange II = 10 mg/L).

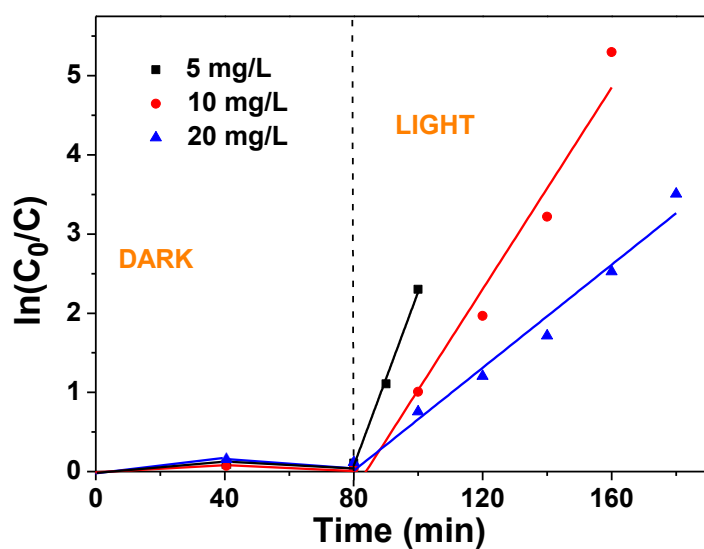

**Figure S6:** Plots of  $\ln(C_0/C)$  of Orange II versus reaction time when varying the concentration of Orange II (5, 10 or 20 mg/L).
